# Supplementary material
Source: Springer Nature journal article supplement (https://www.springerprofessional.de/resource/supplementary/13638_2013_898_MOESM6_ESM.pdf/11899176)

$N = 1$ 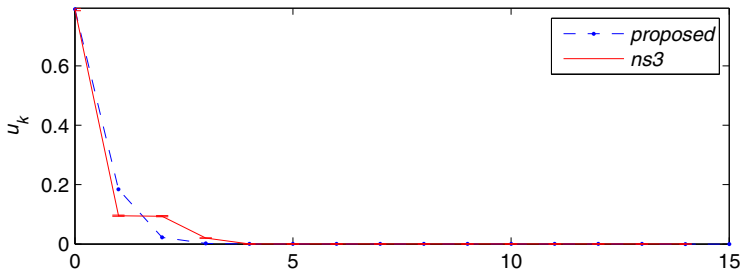 $N = 4$ 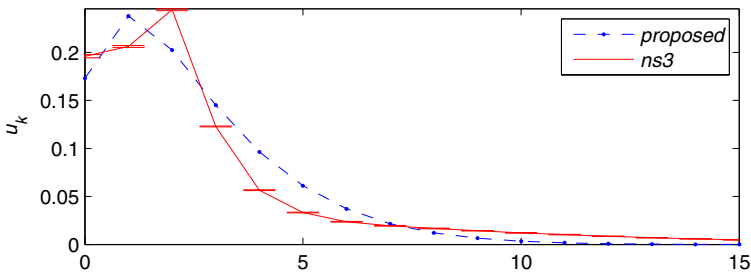 $N = 16$ 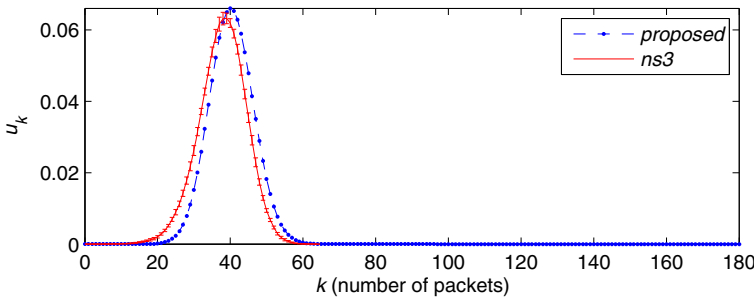

Supplement: MOESM6 [file 11899176]
